# Supplementary material for: Annotation and expression of carboxylesterases in the silkworm, Bombyx mori
Source: Springer Nature journal article supplement (doi:10.1186/1471-2164-10-553), 2009-11-24
Supplement: 12864_2009_2437_MOESM6_ESM.pdf [file 12864_2009_2437_MOESM6_ESM.pdf]

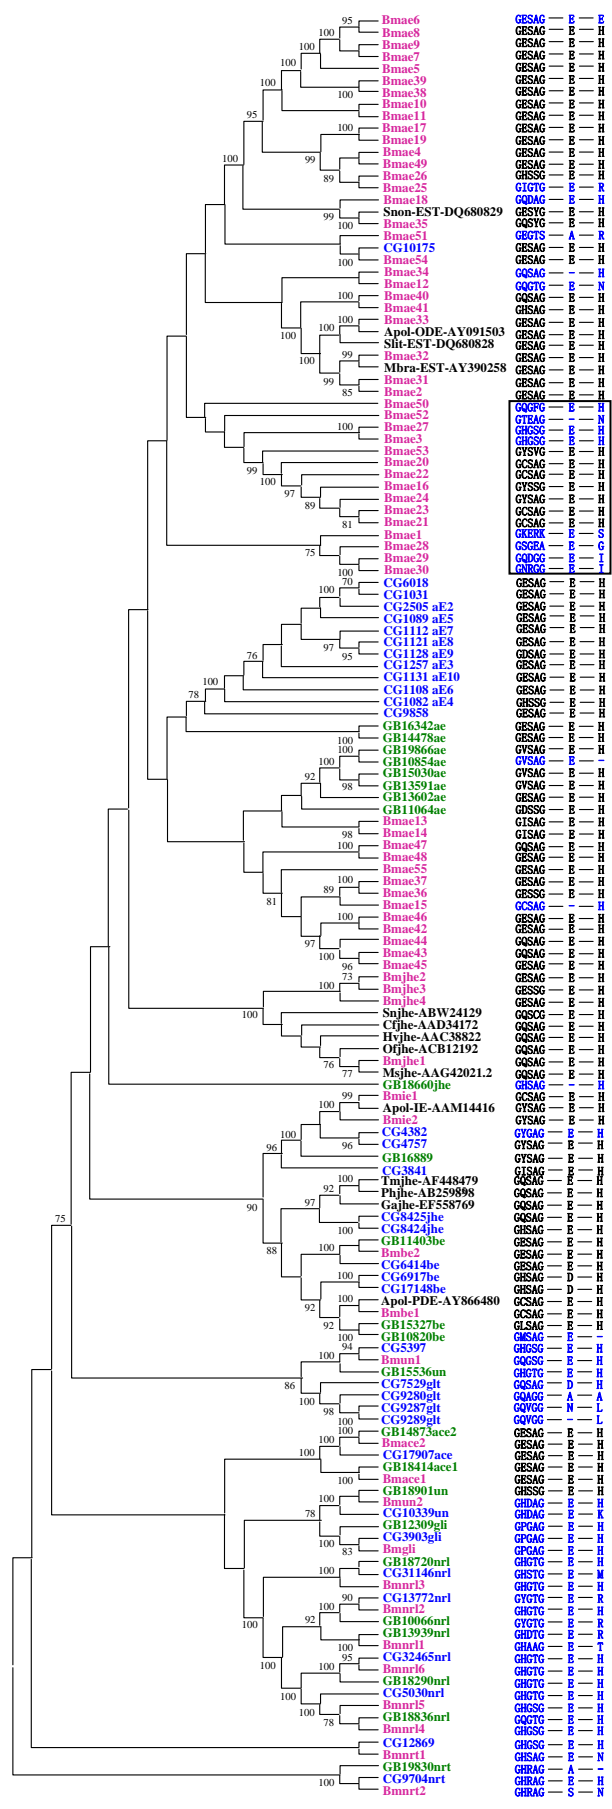

- (A) Lepidopteran radiation with related group
- (B) Dipteran and Hymendopteran alpha esterase
- (C) Lepidopteran and Hymendopteran alpha esterase
- (D) Lepidopteran and Hymendopteran JHE
- (E) Integument esterase
- (F) Dipteran JHE
- (G) Beta esterase
- (H) Uncharacterised group
- (I) Glutactin
- (J) Acetylcholinesterase
- (K) Uncharacterised group
- (L) Gliotactin
- (M) Neurologin
- (N) Neurotactin

Intracellular catalytic class

Secreted catalytic class

Neurodevelopmental class
