# Supplementary figures and images for: Annotation and expression of carboxylesterases in the silkworm, Bombyx mori
Source: Springer Nature journal article supplement (doi:10.1186/1471-2164-10-553), 2009-11-24

**A**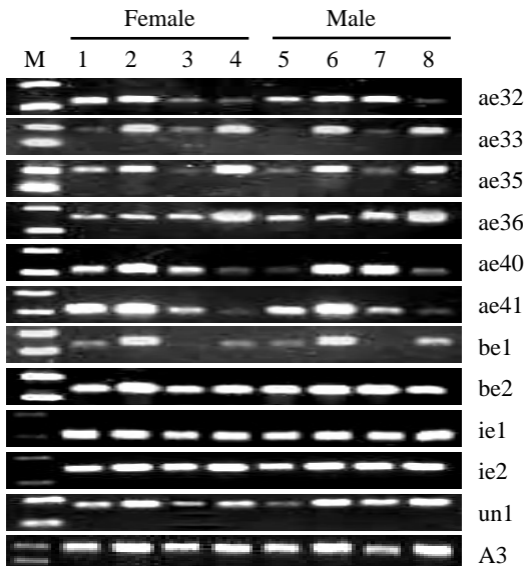**B**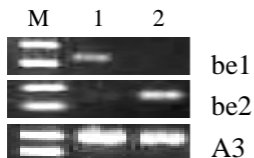

Supplement: 12864_2009_2437_MOESM10_ESM.pdf [file 12864_2009_2437_MOESM10_ESM.pdf]

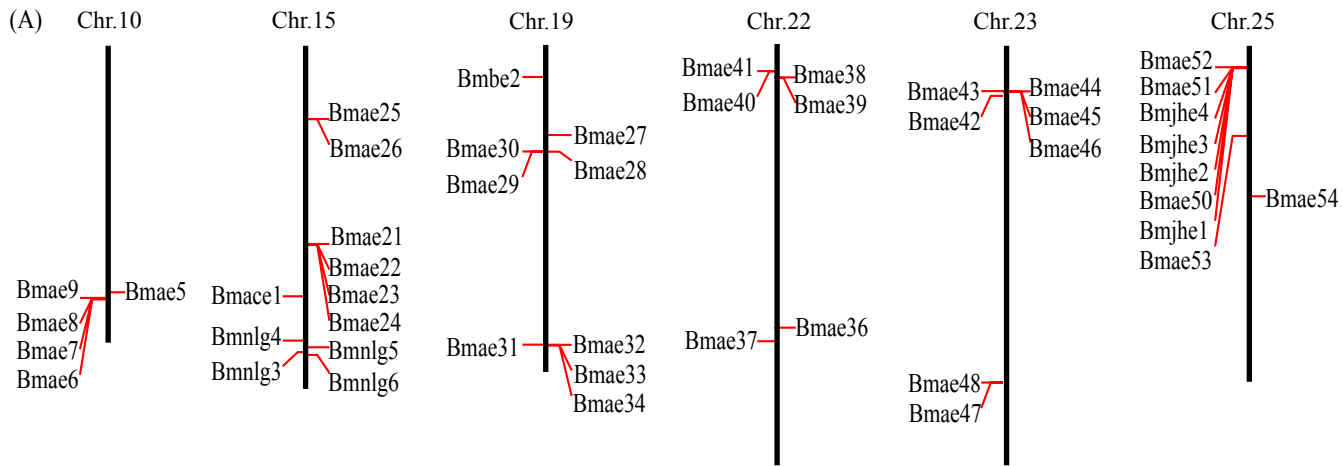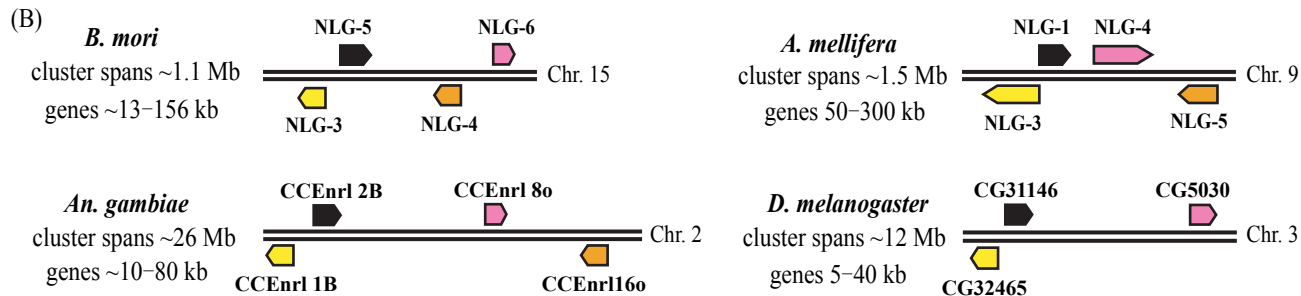

Supplement: 12864_2009_2437_MOESM8_ESM.pdf [file 12864_2009_2437_MOESM8_ESM.pdf]

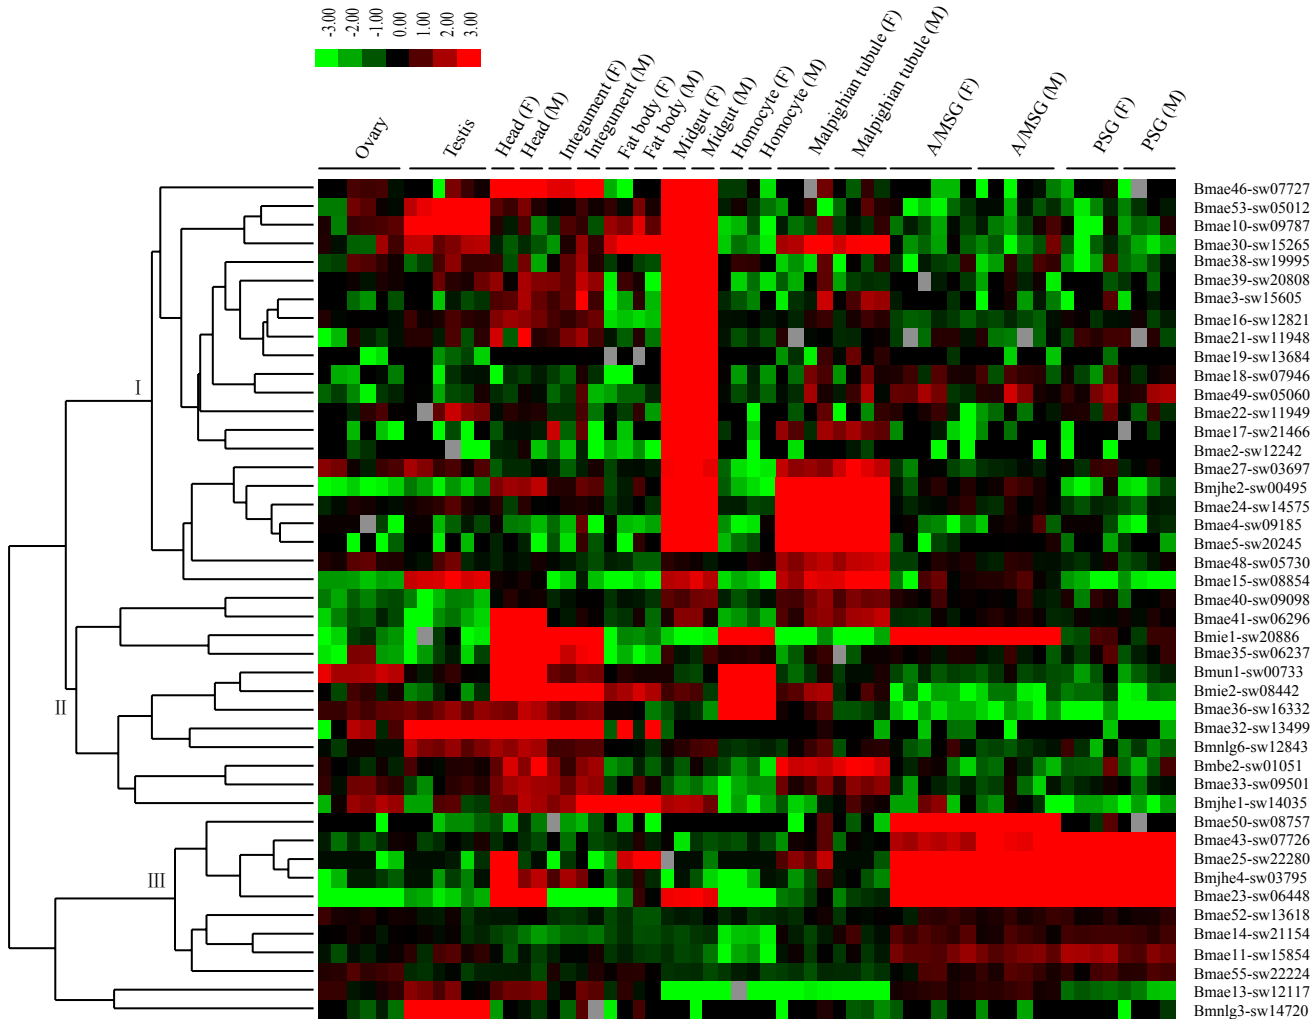

Supplement: 12864_2009_2437_MOESM9_ESM.pdf [file 12864_2009_2437_MOESM9_ESM.pdf]
